# Supplementary material
Source: Springer Nature journal article supplement (https://www.springermedizin.de/resource/supplementary/12885_2011_2746_MOESM1_ESM.pdf/9461870)

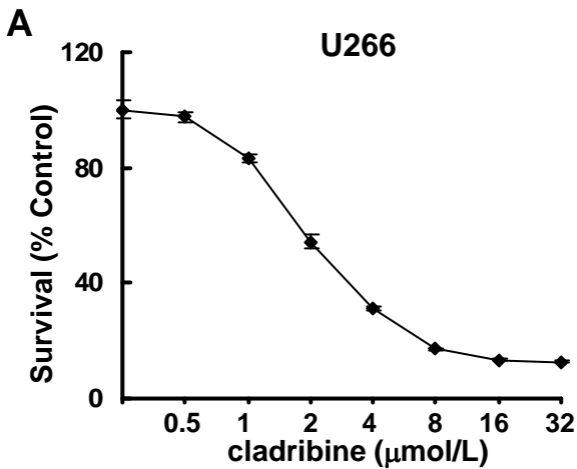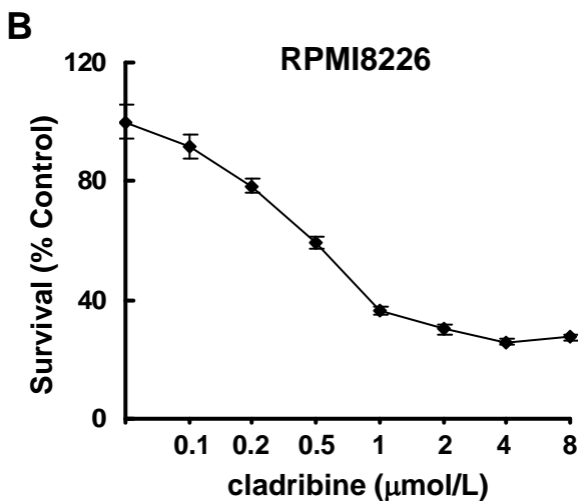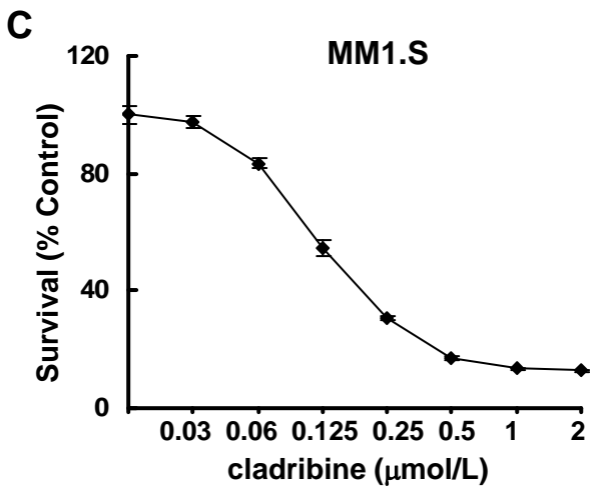

Supplement: MOESM1 [file 9461870]
